# Supplementary material for: Influence of Fermentation Time on the Phenolic Compounds, Vitamin C, Color and Antioxidant Activity in the Winemaking Process of Blueberry (Vaccinium corymbosum) Wine Obtained by Maceration
Source: MDPI journal article supplement (doi:10.3390/molecules27227744), 2022-11-10
Supplement: s1 [file s1]

## Supplementary Material

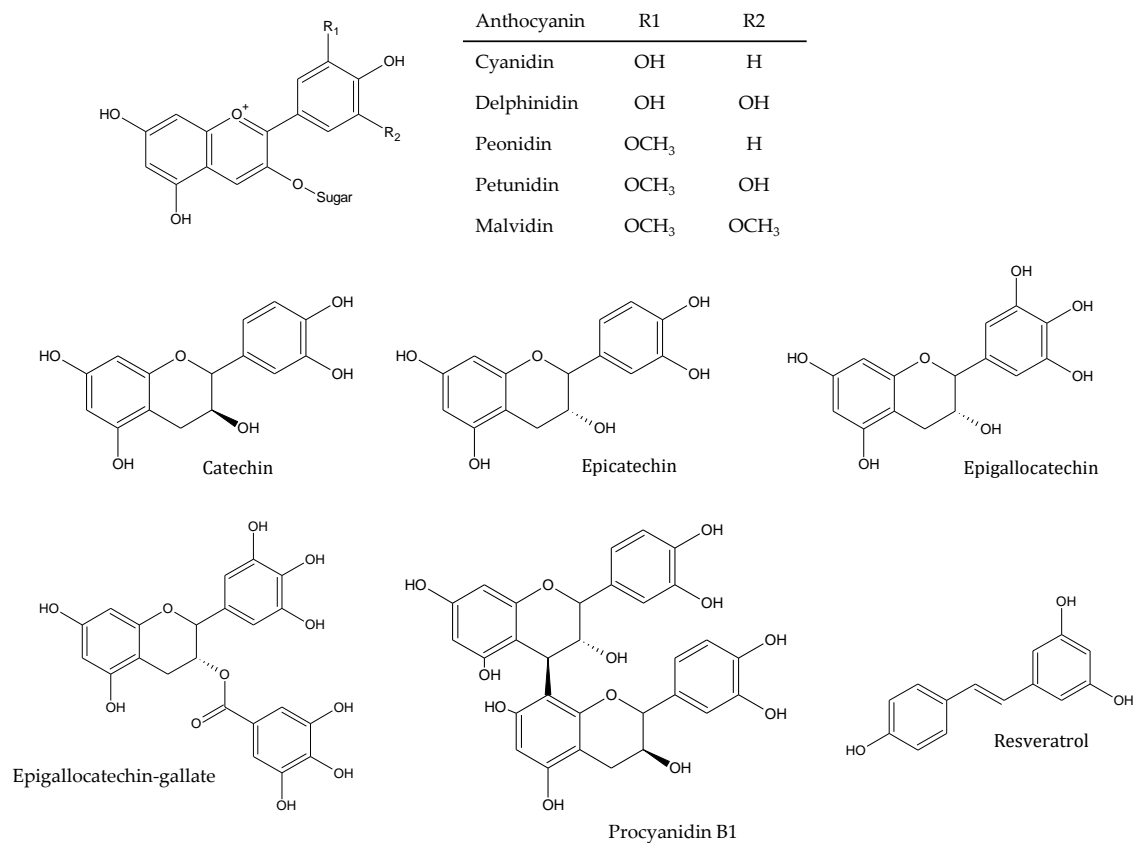

Structures of Catechin, Epicatechin, Epigallocatechin, Epigallocatechin-gallate, Procyanidin B1 and Resveratrol.
